# Supplementary material for: A Constraint-Based Model Analysis of Enterocyte Mitochondrial Adaptation to Dietary Interventions of Lipid Type and Lipid Load
Source: Front Physiol. 2018 Jun 15;9:749. doi: 10.3389/fphys.2018.00749 (PMC6013923; doi:10.3389/fphys.2018.00749)
Supplement: Supplementary file 3 [file Data_Sheet_3.XLSX]

## Sheet: S3-Metabolite_Description
Supplemental table S3: MT_mmuENT127 (metabolite description)
Abbreviation	Description	Charged formula	Charge	KEGG/HMDB ID/CHEBI
5aop	5-Amino-4-oxopentanoate	C5H9NO3	0	C00430, D07567
aacoa	Acetoacetyl-CoA	C25H36N7O18P3S	-4	C00332
coa	Coenzyme A	C21H32N7O16P3S	-4	C00010
cit	Citrate	C6H5O7	-3	C00158
icit	Isocitrate	C6H5O7	-3	C00311
amp	AMP	C10H12N5O7P	-2	C00020
atp	ATP	C10H12N5O13P3	-4	C00002
adp	ADP	C10H12N5O10P2	-3	C00008
itp	Inosine triphosphate	C10H11N4O14P3	-4	C00081
idp	IDP	C10H11N4O11P2	-3	C00104
aglyc3p_m	1-acyl-sn-glycerol 3-phosphate, mitochondria	C21H38O7P	0
facoa_m
pa_m	Phosphatidic acid		-2
akg	2-Oxoglutarate	C5H4O5		C00026
nad	Nicotinamide adenine dinucleotide		-1	C00003
co2	Carbon dioxide			C00011
nadh	Nicotinamide adenine dinucleotide		-2	C00004
succoa	Succinyl-CoA		-5	C00091
mal-L	Malate	C4H4O5	-2	C00149
gly	Glycine	C2H5NO2	0	C00037
h	H+	H	1	C00080
arg-L	L-Arginine	C6H15N4O2	1	C00062, C02385
glu-L	L-Glutamate	C5H8NO4	-1	C00025, C00302
asp-L	L-Aspartate	C4H6NO4	-1	C00049, C16433
oaa	Oxaloacetate	C4H2O5	-2	C00036, C03981
ctp	CTP	C9H12N3O14P3	-4	C00063
cmp	CMP	C9H12N3O8P	-2	C00055
pi	Phosphate	HO4P,HPO4,H1O4P	-2	C00009, C13558
h2o	Water	H2o	0	C00001, C01328,C18714
ttdcrn	Tetradecanoyl carnitine	C21H41NO4	0
crn	L-Carnitine	C7H15NO3	0	C00318, C00487
tdcoa	Tetradecanoyl-CoA (n-C14:0CoA)	C35H58N7O17P3S	-4	C02593
pmtcrn	L-Palmitoylcarnitine	C23H45NO4	0
pmtcoa	Palmitoyl-CoA (n-C16:0CoA)	C37H62N7O17P3S	-4	C00154
stcrn	Stearoylcarnitine	C25H49NO4	0
stcoa	Stearoyl-CoA (n-C18:0CoA)	C39H66N7O17P3S	-4	C00412
odecrn	Octadecenoyl carnitine	C25H47NO4	0
odecoa	Octadecenoyl-CoA (n-C18:1CoA)	C39H64N7O17P3S	-4
lnlccrn	Linoleyl carnitine	C25H45NO4	0
lnlccoa	Linoleic coenzyme A	C39H62N7O17P3S	-4	C02050
lnlncacrn	Alpha-linolenyl carnitine	C25H43NO4	0
lnlncacoa	Alpha-Linolenoyl-CoA	C39H60N7O17P3S	-4	C16162
h2o2	Hydrogen peroxide	H2O2	0	C00027, C17732,C18566
o2	O2 O2	O2	0	C00007
nh4	Ammonium	H4N,NH4	1	C00014, C01342
cbp	Carbamoyl phosphate	CH2NO5P	-2	C00169
citr-L	L-Citrulline	C6H13N3O3,C6H14N3O3	0	C00327
pep	Phosphoenolpyruvate	C3H2O6P	-3	C00074
creat	Creatine cytosol	C4H9N3O2	0	C00791
pcreat	Phosphocreatine	C4H9N3O5P,C4H8N3O5P	-1,-2
pg_m	Peptidoglycan	C39H64N8O19	0
clpn_m	Cardiolipin (homo sapiens)	C9H16O9P2RCO2R2CO2RCO2R2CO2	-2
glyc	Glycerol	C3H8O3	0	C00116
focytC	Ferrocytochrome c	C34H32FeN4O4R4,C34H32FeN4O4,C42H53FeN8O6S2	1,2,-2	C00924
ficytC	Ferricytochrome c	C42H54FeN8O6S2,C42FeH54N8O6S2	3	C00125, C00126,C00524, C00923
o2s	Superoxide anion	O2	-1	C00704
q10h2	Ubiquinol-10	C59H92O4	0
q10	Ubiquinone-10	C59H90O4	0	C11378
12dgr_m	1 2 Diacylglycerol	C3540H6644O500	0
cdpdag_m	CDP diacylglycerol	C12H17N3O11P2RCO2R2CO2	-2
ppi	Diphosphate	HO7P2,P2HO7,H1O7P2	-3	C00013
dgsn	Deoxyguanosine	C10H13N5O4	0	C00330
dgmp	DGMP	C10H12N5O7P	-2	C00362
dhor-S	(S)-Dihydroorotate	C5H5N2O4	-1	C00337
orot	Orotate	C5H3N2O4	-1	C00295
pheme	Protoheme	C34H30FeN4O4,C34H32FeN4O4,C34FeH30N4O4	-2,-1	C00032
pc_m	Phosphatidylcholine	C4040H7844N100O800P100	0
pe_m	Phosphatidylethanolamine	C1660H3365N50O192P50	0
cdp	CDP	C9H12N3O11P2	-3	C00112
gdp	GDP	C10H12N5O11P2	-3	C00035, G10620
udp	UDP	C9H11N2O12P2	-3	C00015, G10619
dutp	DUTP	C9H11N2O14P3	-4	C00460
dump	DUMP	C9H11N2O8P	-2	C00365
cdpea	CDPethanolamine	C11H19N4O11P2	-1	C00570
fad	Flavin adenine dinucleotide oxidized	C27H31N9O15P2	-2	C00016
fadh2	Flavin adenine dinucleotide reduced	C27H33N9O15P2	-2	C01352
c226coa	Cervonyl coenzyme A	C43H62N7O17P3S	-4
tmndnccoa	Timnodonyl coenzyme A	C41H60N7O17P3S	-4
fe2	Fe2+ mitochondria	Fe	2	C14818
ppp9	Protoporphyrin	C34H32N4O4	-2	C02191
fum	Fumarate	C4H2O4	-2	C00122
succ	Succinate	C4H4O4	-2	C00042
for	Formate	CH1O2,CHO2	-1	C00058
thf	5,6,7,8-Tetrahydrofolate	C19H21N7O6	-2	C00101
10fthf	10-Formyltetrahydrofolate	C20H21N7O7	-2	C00234
glyc3p	Glycerol 3-phosphate	C3H7O6P	-2	C00093
dhap	Dihydroxyacetone phosphate	C3H5O6P	-2	C00111
amet	S-Adenosyl-L-methionine	C15H23N6O5S	1	C00019
gudac	Guanidinoacetate	C3H7N3O2	0
ahcys	S-Adenosyl-L-homocysteine	C14H20N6O5S	0	C00021
ser-L	L-Serine	C3H7NO3	0	C00065, C00716
mlthf	5,10-Methylenetetrahydrofolate	C20H21N7O6	-2	C00143
orn	Ornithine	C5H13N2O2	1	C00077, C01602
dhdascb	Dehydroascorbate	C6H5O6,C6H6O6	0	C05422
gthrd	Reduced glutathione	C10H15N3O6S,C10H16N3O6S	-1	C00051
ascb-L	L-Ascorbate	C6H8O6,C6H7O6	0,-1	C00072, C20364
gthox	Oxidized glutathione	C20H30N6O12S2,C20H28N6O12S2	-2	C00127
nadph	C21H26N7O17P3	C21H26N7O17P3	-4	C00005
nadp	Nicotinamide adenine dinucleotide phosphate	C21H25N7O17P3	-3	C00006
gtp	GTP	C10H12N5O14P3	-4
h2co3	Carbonic acid	CH2O3,H2CO3	0	C00288, C01353,C12893
3hacoa	(S)-3-Hydroxyacyl-CoA	C24H35N7O18P3RS
3oacoa	3-Oxoacyl-CoA	C24H33N7O18P3RS		C00264
hco3	Bicarbonate	CHO3,HCO3	-1	C00288, C01353,C12893
hmgcoa	Hydroxymethylglutaryl CoA	C27H39N7O20P3S,C27H40N7O20P3S	-5
acac	Acetoacetate	C4H5O3	-1	C00164
lys-L	L-Lysine	C6H15N2O2	1	C00047, C16440
pyr	Pyruvate	C3H3O3	-1	C00022
2mop	2-Methyl-3-oxopropanoate	C4H5O3	-1	C00349
ppcoa	Propanoyl-CoA	C24H36N7O17P3S	-4	C00100
chol	Choline	C5H14NO	1	C00114
pgp_m	Phosphatidyl glycerol phosphate	C6H11O9P2RCO2R2CO2	-3
mmcoa-S	(S)-Methylmalonyl-CoA	C25H35N7O19P3S	-5	C00683
pppg9	Protoporphyrinogen	C34H38N4O4	-2	C01079
ps_m	Phosphatidylserine	C6H11NO6PRCO2R2CO2	-1
methf	5,10-Methenyltetrahydrofolate	C20H21N7O6,C20H20N7O6	-1	C00445
5fthf	5-Formyltetrahydrofolate	C20H21N7O7	-2	C03479
thymd	Thymidine	C10H14N2O5	0	C00214
dtmp	DTMP	C10H13N2O8P	-2	C00364
tyr-L	L-Tyrosine	C9H11NO3	0	C00082, C01536
34hpp	3-(4-Hydroxyphenyl)pyruvate	C9H7O4	-1	C01179, C05350
tmndnccrn	Timnodonyl carnitine	C27H43NO4	0
c226crn	Cervonyl carnitine	C29H45NO4	0
mag_lnlnca
dag_lnlnca
lnlnca
tag_lnlnca
urea	Urea	CH4N2O,CH5N2O	0	C00086
argsuc	N(omega)-(L-Arginino)succinate	C10H17N4O6	-1	C03406
cholp	Choline phosphate	C5H13NO4P	-1	C00588
cdpchol	CDPcholine	C14H25N4O11P2	-1	C00307
cpppg3	Coproporphyrinogen III	C36H40N4O8	-4	C03263
crvnc	Cervonic acid,	C22H31O2	-1
cys-L	L-Cysteine	C3H7NO2S	0	C00097, C00736
2pg	D-Glycerate 2-phosphate	C3H4O7P	-3	C00631
dag_ocdcea	Diacylglycerol	C3H6ORCO2R2CO2	0	C00165, C00641
dag_ocdca	Diacylglycerol	C3H6ORCO2R2CO3	0	C00165, C00642
dag_ttdca	Diacylglycerol	C3H6ORCO2R2CO4	0	C00165, C00643
glc-D	D-Glucose	C6H12O6	0	C00031
hdca	Hexadecanoate (n-C16:0)	C16H31O2	-1	C00249
lac-L	L-Lactate	C3H5O3	-1	C00186
lnlc	Linoleic acid (all cis C18:2) n-6	C18H31O2	-1	C01595
mag_hdca	Monoacylglycerol	C3H7O2R2CO2	0
mag_lnlc	Monoacylglycerol	C3H7O2R2CO3	0
mag_ocdca	Monoacylglycerol	C3H7O2R2CO4	0
mag_ocdcea	Monoacylglycerol	C3H7O2R2CO5	0
mag_ttdca	Monoacylglycerol	C3H7O2R2CO6	0
na1	Sodium	Na	1	C01330, C14042
ocdca	Octadecanoate (n-C18:0)	C18H35O2	-1	C01530
ocdcea	Octadecenoate	C18H33O2	-1	C00712
tag_hdca	Triacylglycerol	C3H5RCO2R2CO2R3CO2	0
tag_lnlc	Triacylglycerol	C3H5RCO2R2CO2R3CO3	0
tag_ocdca	Triacylglycerol	C3H5RCO2R2CO2R3CO4	0
tag_ocdcea	Triacylglycerol	C3H5RCO2R2CO2R3CO5	0
tag_ttdca	Triacylglycerol	C3H5RCO2R2CO2R3CO6	0
ttdca	Tetradecanoate	C14H27O2	-1
fdp	D-Fructose 1,6-bisphosphate	C6H10O12P2	-4
g3p	Glyceraldehyde 3-phosphate	C3H5O6P	-2	C00118, C00661
g6p	D-Glucose 6-phosphate	C6H11O9P	-2	C00092
g6p-B	Beta D glucose 6 phosphate	C6H11O9P	-2	C01172
f6p-B	Beta-D-Fructose 6-phosphate	C6H11O9P		C05345
13dpg	3-Phospho-D-glyceroyl phosphate	C3H4O10P2	-4	C00236
glucys	Gamma-L-Glutamyl-L-cysteine	C8H13N2O5S	-1	C00669
oh1	Hydroxide	HO	-1	C00001, C01328,C18714
dag_hdca	Diacylglycerol	C3H6ORCO2R2CO2	0	C00165, C00641
ppbng
hmbil
dag_lnlc	Diacylglycerol	C3H6ORCO2R2CO2	0	C00165, C00641
f6p	D-Fructose 6-phosphate	C6H11O9P	-2	C05345
3pg	3-Phospho-D-glycerate	C3H4O7P	-3	C00197
uppg3
tmndnc	Timnodonic acid C20:5	C20H29O2	-1
tag_tmndnc
dag_tmndnc
mag_tmndnc
tag_crvnc
dag_crvnc
mag_crvnc
